# Supplementary material for: Meditation practice improves body balance compared to stability exercises alone
Source: Research Square preprint supplement (doi:10.21203/rs.3.rs-2941993/v1), 2023-07-24
Supplement: Supplementary file 1 [file f411b45c307a8a92d47d50ad.pdf]

# Article Title: **Meditation practice improves body balance compared to stability exercises alone**

Authors: Davide Anchisi\*, Brenno Ros, Luigino Sepulcri

## Supplementary Information

### Isometric trunk stability exercises

1. Plank with elbows on the ground, focus on keeping the body aligned for 20 seconds.
2. Plank with straight arms, raising alternately one arm for 3 seconds, repeated 3 times.
3. Plank with straight arms, raising alternately one leg for 3 seconds, repeated 3 times.
4. Plank with straight arms, raising one leg and the contralateral arm for 3 seconds, 3 times each side.
5. Plank with straight arms, raising one leg and one arm of the same side for 3 seconds, 3 times each side.
6. Side plank on the elbow, focus on keeping the body aligned for 20 seconds for each side.
7. Side plank on elbow, raising a leg and keeping the position for 3 seconds, 3 times each side.
8. Side plank on elbow, raising the arm and keeping the position for 3 seconds, 3 times each side.
9. Side plank on elbow, raising arm and leg, and keeping the position for 3 seconds, 3 times each side.

### Stability exercises on fit-ball

Balance training on fit-ball followed a progression in four steps (Fig. 1):

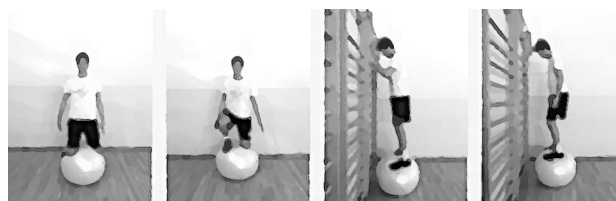

Fig. 1 Stability exercises on fit-ball.

1. Kneeling on the fit-ball, staying balanced for 20 seconds.
2. Kneeling on the fit-ball, raising a leg to set a foot on the ball, balancing for 10 seconds on each leg.
3. Standing on the fit-ball with the hands placed on a support, keeping balance for 20 seconds.
4. Standing on the fiball, balancing as long as possible without any support.

---

\*Corresponding author – Department of Medicine, University of Udine, 33100 Udine, Italy. E-mail: [davide.anchisi@uniud.it](mailto:davide.anchisi@uniud.it)
